# Supplementary material for: A novel polymer-conjugated human IL-15 improves efficacy of CD19-targeted CAR T-cell immunotherapy
Source: PubMed Central journal article supplement — Blood Adv. 2022 Nov 5;7(11):2479–93. doi: 10.1182/bloodadvances.2022008697 (PMC10242497; doi:10.1182/bloodadvances.2022008697), 2022-11-05
Supplement: BLOODA_ADV-2022-008697-mmc1.pdf [file BLOODA_ADV-2022-008697-mmc1.pdf]

## Supplemental Data

### Supplemental Methods

#### Evaluation of B cells, monocytes, and T cell memory subsets in non-human primates following NKTR-255 administration

Male cynomolgus monkeys (3 to 4 per group) received a single IV dose of NKTR-255 at dose levels of 0.001, 0.01, or 0.1 mg/kg. Blood samples were collected from each animal before treatment (days -5 and -2) and at multiple intervals following treatment to evaluate absolute numbers of B cells (CD3<sup>+</sup>CD20<sup>+</sup>) and monocytes (CD45<sup>+</sup>CD3<sup>-</sup>CD20<sup>-</sup>CD8<sup>-</sup>SSC<sup>mid</sup>) by flow cytometry. Naïve (CD45RA<sup>+</sup>CCR7<sup>+</sup>CD95<sup>-</sup>), stem cell memory (CD45RA<sup>+</sup>CCR7<sup>+</sup>CD95<sup>+</sup>), central memory (CD45RA<sup>-</sup>CCR7<sup>+</sup>), and effector memory (CD45RA<sup>-</sup>CCR7<sup>-</sup>) subsets were examined for Ki-67 expression. Data was acquired using a LSRFortessa X-20 or FACSCanto II (BD Biosciences) and analyzed using FlowJo software (BD Life Sciences).

#### Evaluation of cytokines *in vitro* in human CAR-T

CAR-T cells were co-cultured with irradiated (15,000 cGy) K562-CD19<sup>+</sup> cells at different effector to target ratios and various concentrations of NKTR-255. Supernatants were collected after 24 hours and levels of IFN- $\gamma$  and TNF- $\alpha$  were measured by Luminex multiplex assay (Luminex Corporation) according to manufacturer's instructions and read on a Luminex 200 instrument.

#### Intracellular cytokine staining in human CAR-T

Mouse bone marrow were co-cultured with irradiated (12,000 cGy) K562-CD19<sup>+</sup> cells at 1:1 effector to target (E:T) ratio for 24 hours. Cells were co-cultured with GolgiStop (BD Bioscience) for five hours and washed with PBS prior to immunophenotyping. Cells were stained with live dead fixable AmCyan (Life Technologies) in PBS at 4°C. Cells were washed with staining buffer (PBS/2% FBS) then blocked with human FcR block (Miltenyi Biotec) and/or mouse FcR block (BioLegend). Surface staining (CD45, CD3, CD8, CD4, Erbitux) was performed with brilliant stain buffer (BD Biosciences). For intracellular staining, cells were fixed and permeabilized using BD Cytofix/Cytoperm Solution Kit (BD Biosciences) and stained with IFN- $\gamma$  (BioLegend) and TNF- $\alpha$  (BD Biosciences) antibodies. Cells were washed then resuspended in Perm/Wash buffer with liquid counting beads (BD Biosciences). Data was acquired using a LSR II, FACSymphony A5 (BD Biosciences) and analyzed using FlowJo software (BD Life Sciences).

Figure S1

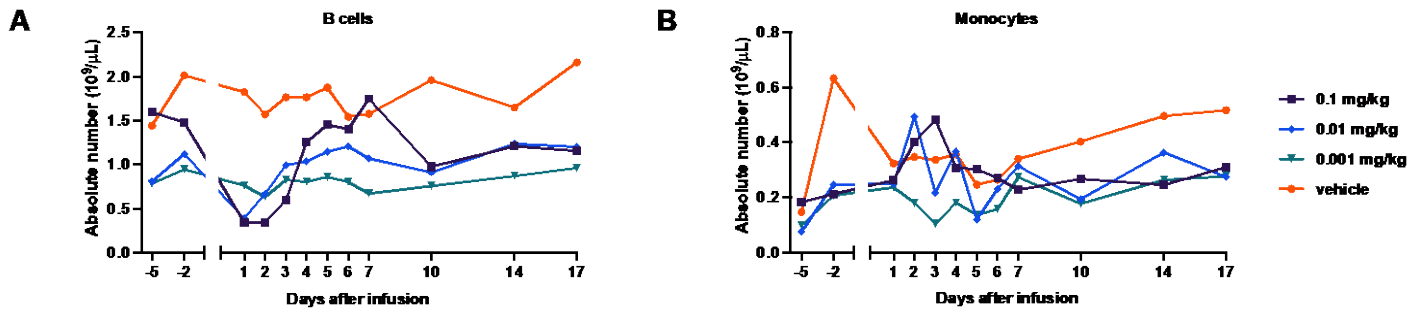

**Figure S1. A single dose of NKTR-255 does not increase absolute numbers of B cells and monocytes in non-human primates.** Cynomolgus monkeys (n = 3-4 per group) received a single IV dose of 0.001, 0.01 or 0.1 mg/kg of NKTR-255 or vehicle. Blood samples were collected pre-infusion and at indicated timepoints to assess the absolute numbers of B cells (A) and monocytes (B) by flow cytometry. Figures show mean values.

Figure S2

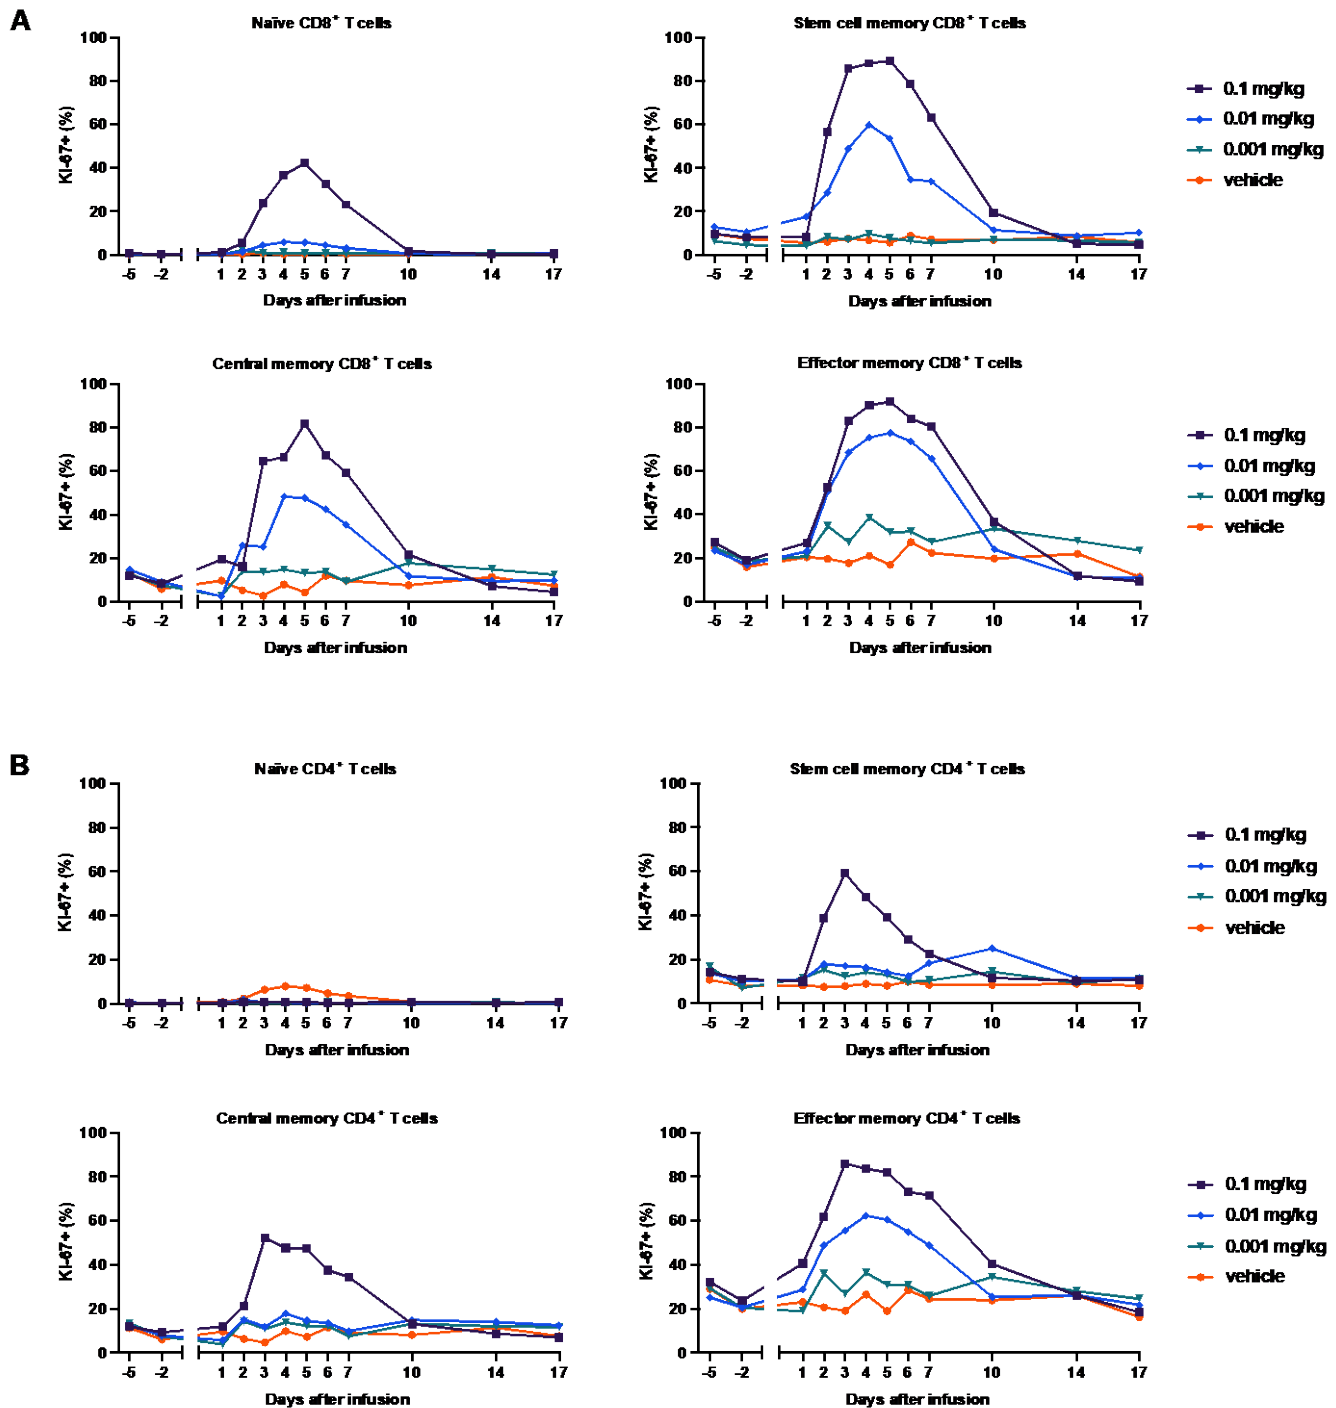

**Figure S2. NKTR-255 increases proliferation in naïve and memory CD8<sup>+</sup> and CD4<sup>+</sup> T cells in non-human primates.** Cynomolgus monkeys (n = 3-4 per group) received a single IV dose of 0.001, 0.01 or 0.1 mg/kg of NKTR-255 or vehicle. Blood samples were collected pre-infusion and at indicated timepoints to assess the percent of Ki-67 positive cells in CD8<sup>+</sup> (A) and CD4<sup>+</sup> (B) naïve (CD45RA<sup>+</sup>CCR7<sup>+</sup>CD95<sup>-</sup>), stem cell memory (CD45RA<sup>+</sup>CCR7<sup>+</sup>CD95<sup>+</sup>), central memory (CD45RA<sup>+</sup>CCR7<sup>+</sup>), and effector memory (CD45RA<sup>+</sup>CCR7<sup>-</sup>) T cell subsets. Figures show mean values.

**Figure S3**

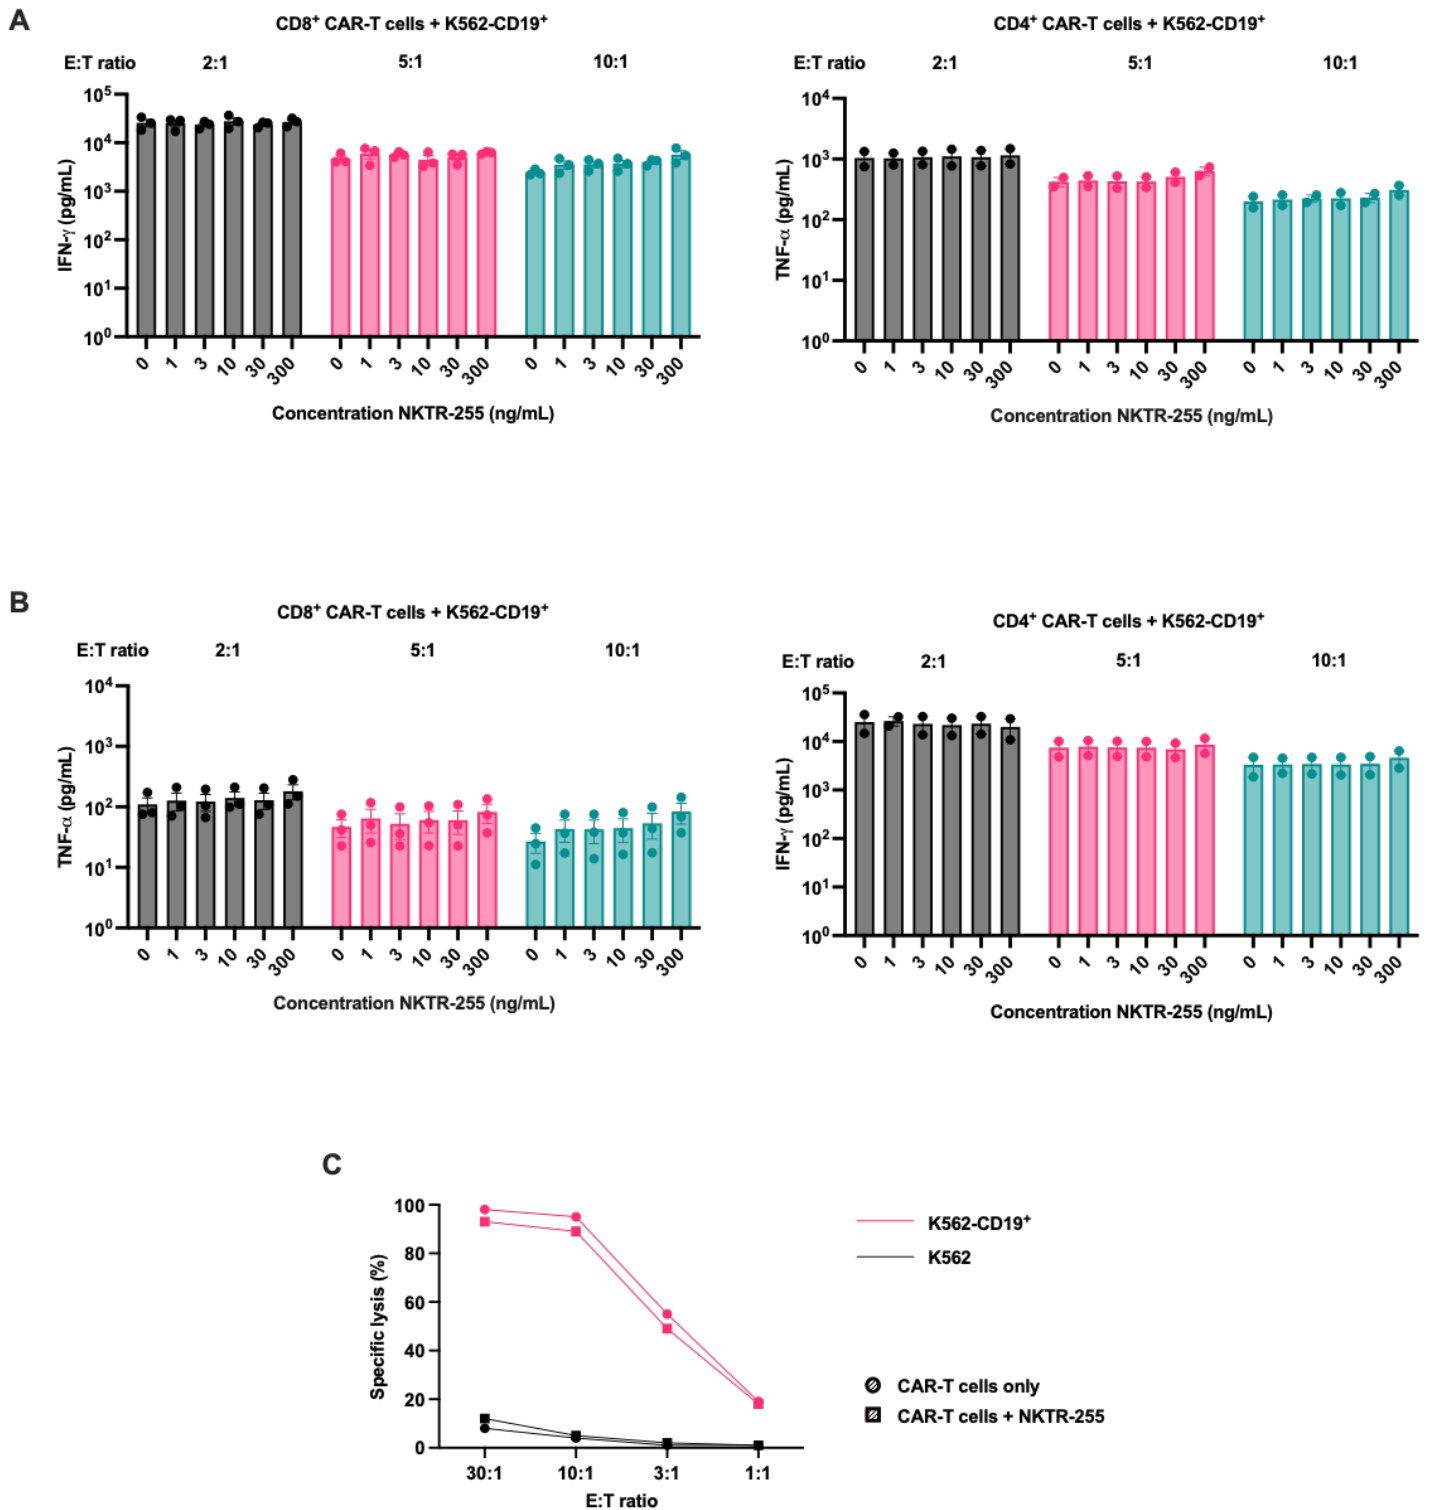

**Figure S3. NKTR-255 does not increase antigen-dependent cytokine production and cytolytic activity from CAR-T cells.** Human CD19 CAR-T cells were generated from healthy donors ( $n = 2-4$ ) and assayed on day 14-16 after start of manufacturing. (A-B) CD8<sup>+</sup> (A) and CD4<sup>+</sup> (B) CAR-T cells were independently co-cultured for 4 days with CD19-expressing K562 cells at the indicated effector to target ratios and indicated concentrations of NKTR-255. Concentrations of IFN- $\gamma$  (left) and TNF- $\alpha$  (right) in the supernatant were measured by Luminex. Figures show mean  $\pm$  standard error of the mean (SEM). (C) Cytolytic activity of CD8<sup>+</sup> CD19 CAR-T cells co-cultured with or without NKTR-25 against <sup>51</sup>Cr-labeled CD19-expressing K562 cells and control K562 target cells at the indicated effector to target ratios analyzed by a standard 4-hour chromium release assay (data representative of two independent experiments).

Figure S4

A

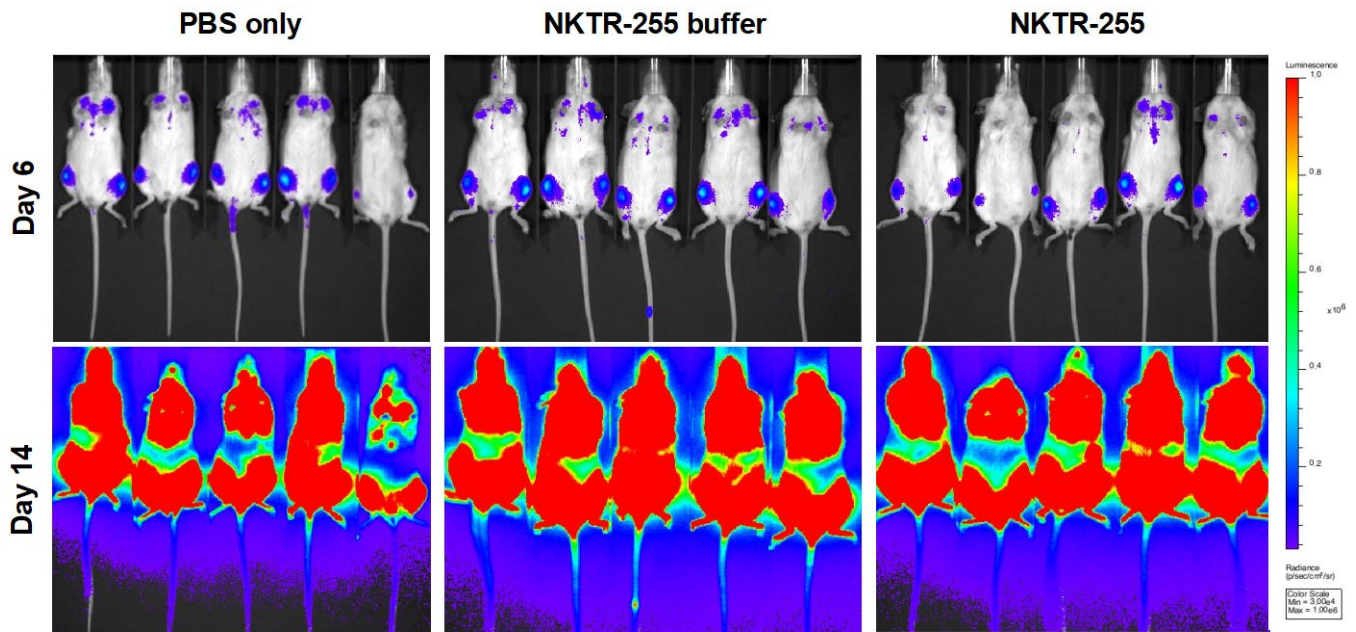

B

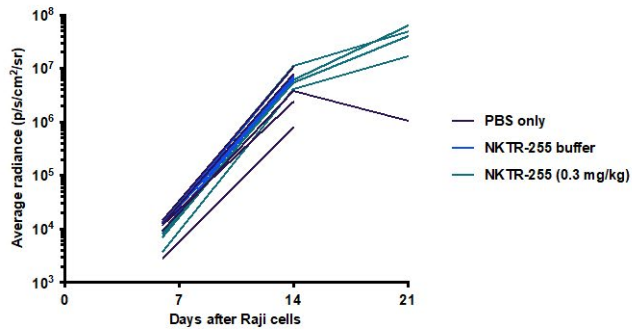

C

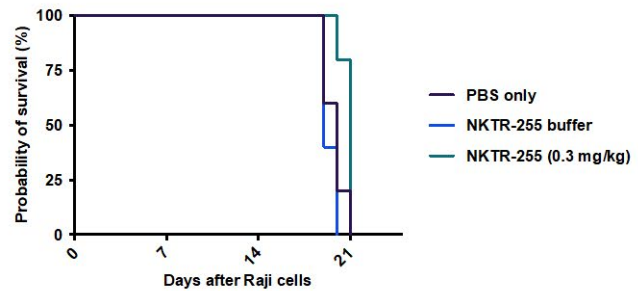

**Figure S4. NKTR-255 does not affect Raji tumor growth kinetics.** NSG mice were injected with Raji tumor cells IV. Six days later, following tumor engraftment, mice received either PBS, NKTR-255 buffer, or NKTR-255 IV weekly. (A) Bioluminescence imaging of Raji tumor burden indicating timepoints. (B) Average radiance of bioluminescence. (C) Kaplan-Meier survival curve.

Figure S5

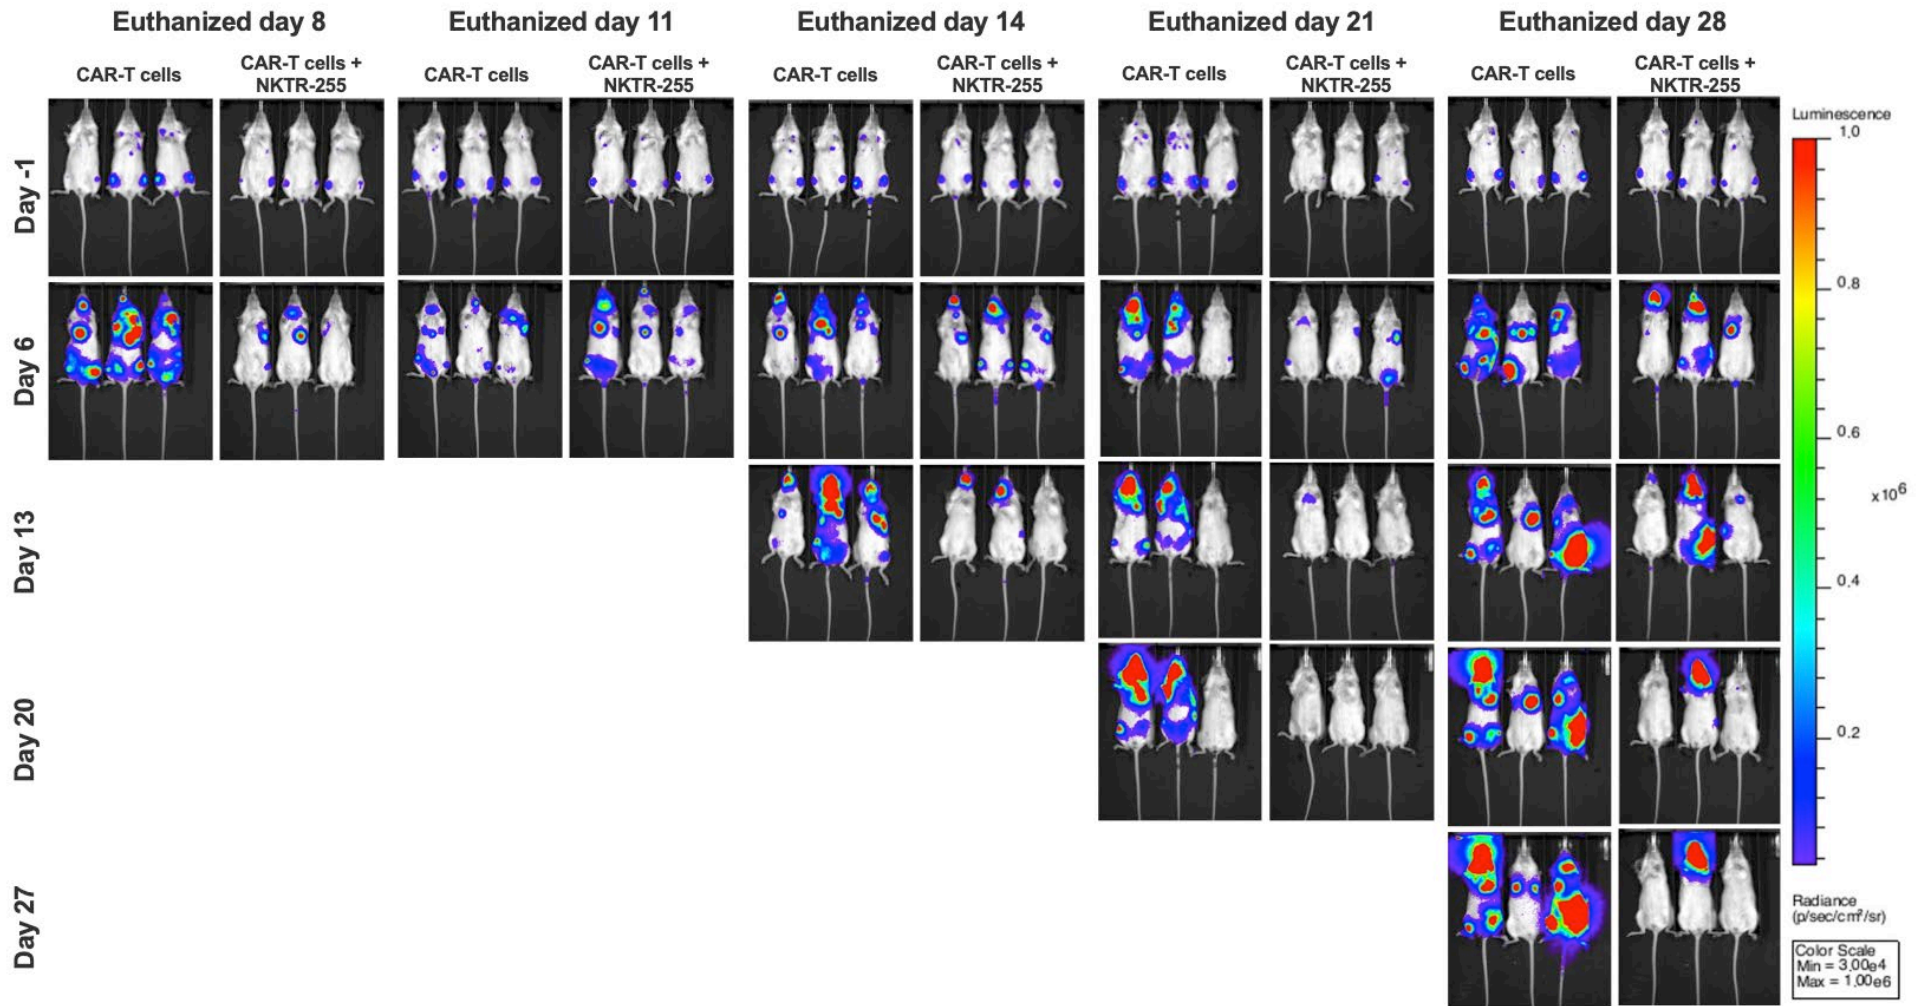

**Figure S5. NKTR-255 increases antitumor efficacy of human CD19 CAR-T cells *in vivo*.** NSG mice were intravenously injected with  $5 \times 10^5$  Raji cells. Seven days later, tumor bearing mice received  $0.8 \times 10^6$  CD19 CAR-T cells (1:1 CD8<sup>+</sup>:CD4<sup>+</sup>) IV. Cohorts of mice ( $n = 3$  per group) received either buffer or NKTR-255 0.3 mg/kg IV weekly starting on day 7 and euthanized at the indicated timepoints. Mice euthanized on day 14, 21, and 28 did not receive 2<sup>nd</sup>, 3<sup>rd</sup>, and 4<sup>th</sup> dose of NKTR-255, respectively. Bioluminescence imaging of Raji tumor burden was obtained at indicated timepoints.

**Figure S6**

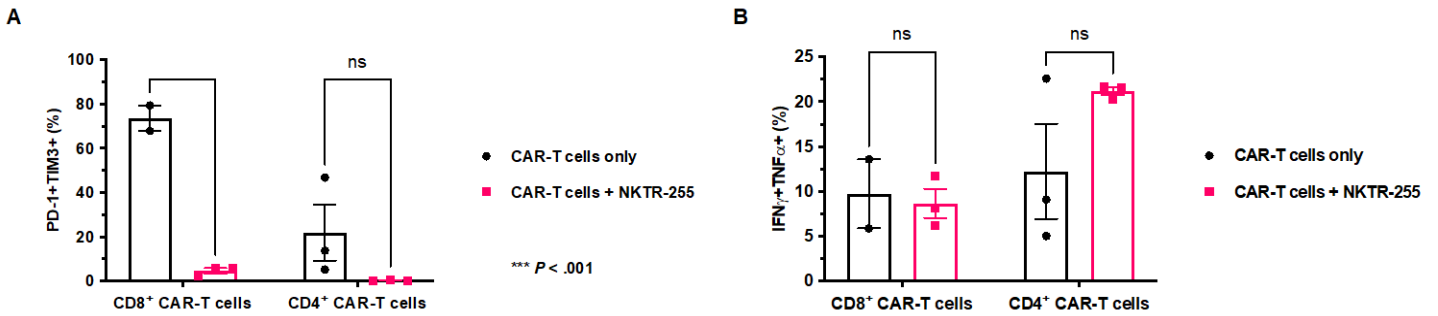

**Figure S6. Persistent human CD19 CAR-T cells are less activated in NKTR-255-treated mice.** NSG mice were intravenously injected with  $5 \times 10^5$  Raji cells. Seven days later, tumor bearing mice received  $0.8 \times 10^6$  CD19 CAR-T cells (1:1 CD8<sup>+</sup>:CD4<sup>+</sup>) IV. Cohorts of mice ( $n = 3$  per group) received either buffer or NKTR-255 0.3 mg/kg IV weekly starting on day 7 and were euthanized on day 28 after CAR-T cell infusion. Single cell suspensions from bone marrow were analyzed by flow cytometry. (A) Percentage of PD-1 and TIM3 double-positive CD8<sup>+</sup> and CD4<sup>+</sup> CAR-T cells in bone marrow. (B) Percentage of IFN- $\gamma$  and TNF- $\alpha$  double-positive CD8<sup>+</sup> and CD4<sup>+</sup> CAR-T cells in bone marrow. One mouse in the CAR-T only group did not have persistent detectable CD8<sup>+</sup> CAR-T cells. Figures show mean +/- standard error of the mean (SEM). Unpaired t test with false discovery rate of 1% by two-stage linear step-up procedure of Benjamini, Krieger, and Yekutieli were used to compare differences between groups. ns, not significant.
